# Supplementary material
Source: PubMed Central journal article supplement (PMC8728871)
Supplement: NIHMS1640981-supplement-04.pdf [file NIHMS1640981-supplement-04.pdf]

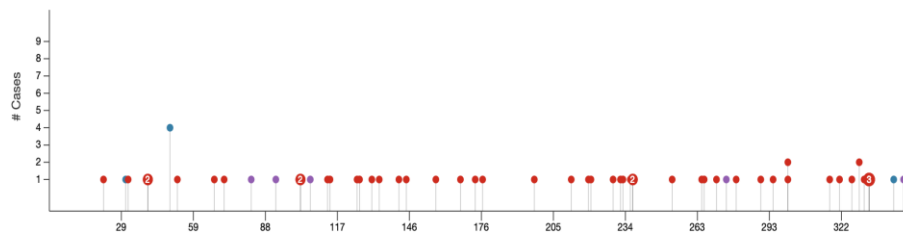

| Tissue                            | Type                      | Protein Change | DNA Change (hg38)             | Gene   |
|-----------------------------------|---------------------------|----------------|-------------------------------|--------|
| Adrenal gland                     | Missense                  | T52R           | chr1:g.84182246C>G            | PRKACB |
| Adrenal gland                     | Stop Gained               | K82*           | chr1:g.84184043A>T            | PRKACB |
| Bladder                           | Missense                  | A233V          | chr1:g.84202738C>T            | PRKACB |
| Bladder                           | Missense                  | T279A          | chr1:g.84214222A>G            | PRKACB |
| Brain                             | Missense                  | D167E          | chr1:g.84196697T>G            | PRKACB |
| Brain                             | Missense                  | G321D          | chr1:g.84235211G>A            | PRKACB |
| Breast                            | Missense                  | S131L          | chr1:g.84185155C>T            | PRKACB |
| Breast                            | Missense                  | L173I          | chr1:g.84196713C>A            | PRKACB |
| Brochus and Lung                  | Missense                  | K22E           | chr1:g.84179194A>G            | PRKACB |
| Brochus and Lung                  | Missense                  | G126V          | chr1:g.84185140G>T            | PRKACB |
| Brochus and Lung                  | Missense                  | A219V          | chr1:g.84202696C>T            | PRKACB |
| Brochus and Lung                  | Missense                  | V267L          | chr1:g.84202698G>T            | PRKACB |
| Brochus and Lung                  | Missense                  | I220M          | chr1:g.84202727C>G            | PRKACB |
| Brochus and Lung                  | Missense                  | R271Q          | chr1:g.84214199G>A            | PRKACB |
| Brochus and Lung                  | Missense                  | T300R          | chr1:g.84214286C>G            | PRKACB |
| Brochus and Lung                  | Missense                  | P317T          | chr1:g.84235198C>A            | PRKACB |
| Brochus and Lung                  | Missense                  | S326R          | chr1:g.84235227C>G            | PRKACB |
| Brochus and Lung                  | Missense                  | Y331S          | chr1:g.84235241A>C            | PRKACB |
| Brochus and Lung                  | Missense                  | E333K          | chr1:g.84235246G>A            | PRKACB |
| Brochus and Lung                  | Missense                  | E333Q          | chr1:g.84235246G>C            | PRKACB |
| Brochus and Lung; Corpus uteri    | Missense                  | T300M          | chr1:g.84214286C>T            | PRKACB |
| Brochus and Lung; Kidney          | Missense                  | D329H          | chr1:g.84235234G>C            | PRKACB |
| Colon                             | Missense                  | W197C          | chr1:g.84197773G>T            | PRKACB |
| Colon                             | Stop Gained               | Q275*          | chr1:g.84214210C>T            | PRKACB |
| Colon                             | Missense                  | T294N          | chr1:g.84214268C>A            | PRKACB |
| Corpus uteri                      | Missense                  | E32D           | chr1:g.84179226G>T            | PRKACB |
| Corpus uteri                      | Missense                  | G40R           | chr1:g.84182209G>A            | PRKACB |
| Corpus uteri                      | Missense                  | G40E           | chr1:g.84182210G>A            | PRKACB |
| Corpus uteri                      | Missense                  | E67A           | chr1:g.84182291A>C            | PRKACB |
| Corpus uteri                      | Missense                  | P125H          | chr1:g.84185137C>A            | PRKACB |
| Corpus uteri                      | Missense                  | P142T          | chr1:g.84196620C>A            | PRKACB |
| Corpus uteri                      | Missense                  | R145W          | chr1:g.84196629C>T            | PRKACB |
| Corpus uteri                      | Missense                  | Y157C          | chr1:g.84196666A>G            | PRKACB |
| Corpus uteri                      | Missense                  | D176G          | chr1:g.84196723A>G            | PRKACB |
| Corpus uteri                      | Missense                  | L212I          | chr1:g.84197816C>A            | PRKACB |
| Corpus uteri                      | Missense                  | L266I          | chr1:g.84214183C>A            | PRKACB |
| Corpus uteri                      | Missense                  | V289A          | chr1:g.84214253T>C            | PRKACB |
| Corpus uteri                      | Stop Gained               | E347*          | chr1:g.84235288G>T            | PRKACB |
| Corpus uteri; Stomach             | Frameshift deletion       | T49Pfs*13      | chr1:g.84182230delA           | PRKACB |
| Gum                               | Stop Gained               | E92*           | chr1:g.84184073G>T            | PRKACB |
| Kidney                            | Missense                  | D265Y          | chr1:g.84214180G>T            | PRKACB |
| Larynx                            | Missense                  | P237S          | chr1:g.84202749C>T            | PRKACB |
| Liver and Intrahepatic bile ducts | Splice Donor Insertion    | X182_splice    | chr1:g.84196743_84196744insTA | PRKACB |
| Ovary                             | Missense                  | M232I          | chr1:g.84202736G>C            | PRKACB |
| Pancreas                          | Missense                  | Y236C          | chr1:g.84202747A>G            | PRKACB |
| Skin                              | Missense                  | A71T           | chr1:g.84182302G>A            | PRKACB |
| Skin                              | Missense                  | P102S          | chr1:g.84184103C>T            | PRKACB |
| Skin                              | Missense                  | P102L          | chr1:g.84184104C>T            | PRKACB |
| Skin                              | Splice Donor substitution | X182_splice    | chr1:g.84196743G>T            | PRKACB |
| Skin                              | Missense                  | P237L          | chr1:g.84202750C>T            | PRKACB |
| Skin                              | Missense                  | S253T          | chr1:g.84202797T>A            | PRKACB |
| Skin                              | Missense                  | E333D          | chr1:g.84235248A>T            | PRKACB |
| Stomach                           | Frameshift insertion      | W31Mfs*8       | chr1:g.84179214_84179215insA  | PRKACB |
| Stomach                           | Stop Gained               | R106*          | chr1:g.84184115C>T            | PRKACB |
| Stomach                           | Missense                  | D113Y          | chr1:g.84185100G>T            | PRKACB |
| Stomach                           | Missense                  | N114D          | chr1:g.84185103A>G            | PRKACB |
| Stomach                           | Frameshift deletion       | K343Nfs*17     | chr1:g.84235274delA           | PRKACB |
| Tonsil                            | Missense                  | R134K          | chr1:g.84185164G>A            | PRKACB |
