# Supplementary material
Source: PubMed Central journal article supplement (PMC8728871)

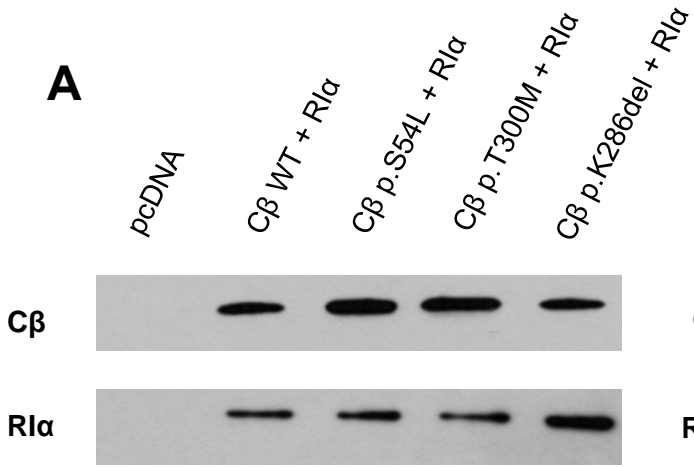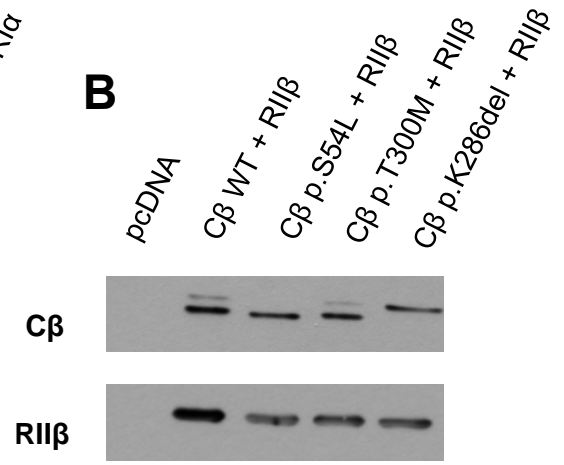

Supplement: NIHMS1640981-supplement-01.pdf [file NIHMS1640981-supplement-01.pdf]

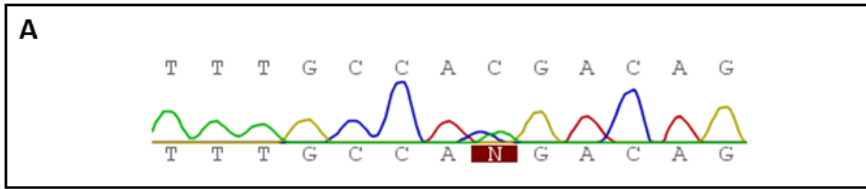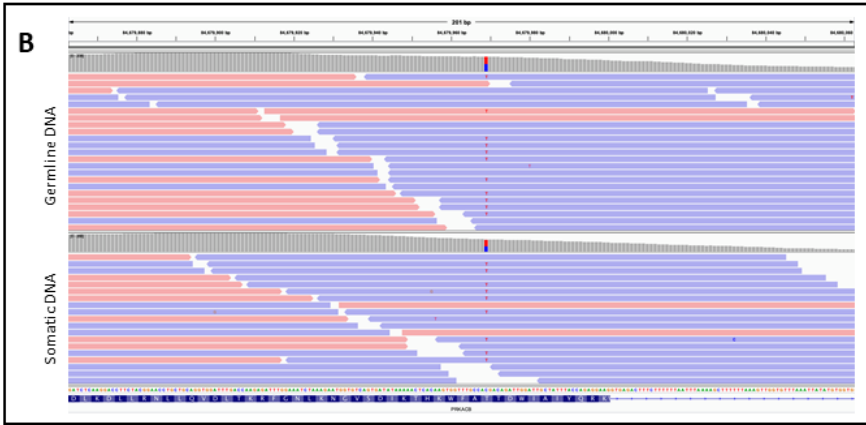

Supplement: NIHMS1640981-supplement-03.pdf [file NIHMS1640981-supplement-03.pdf]

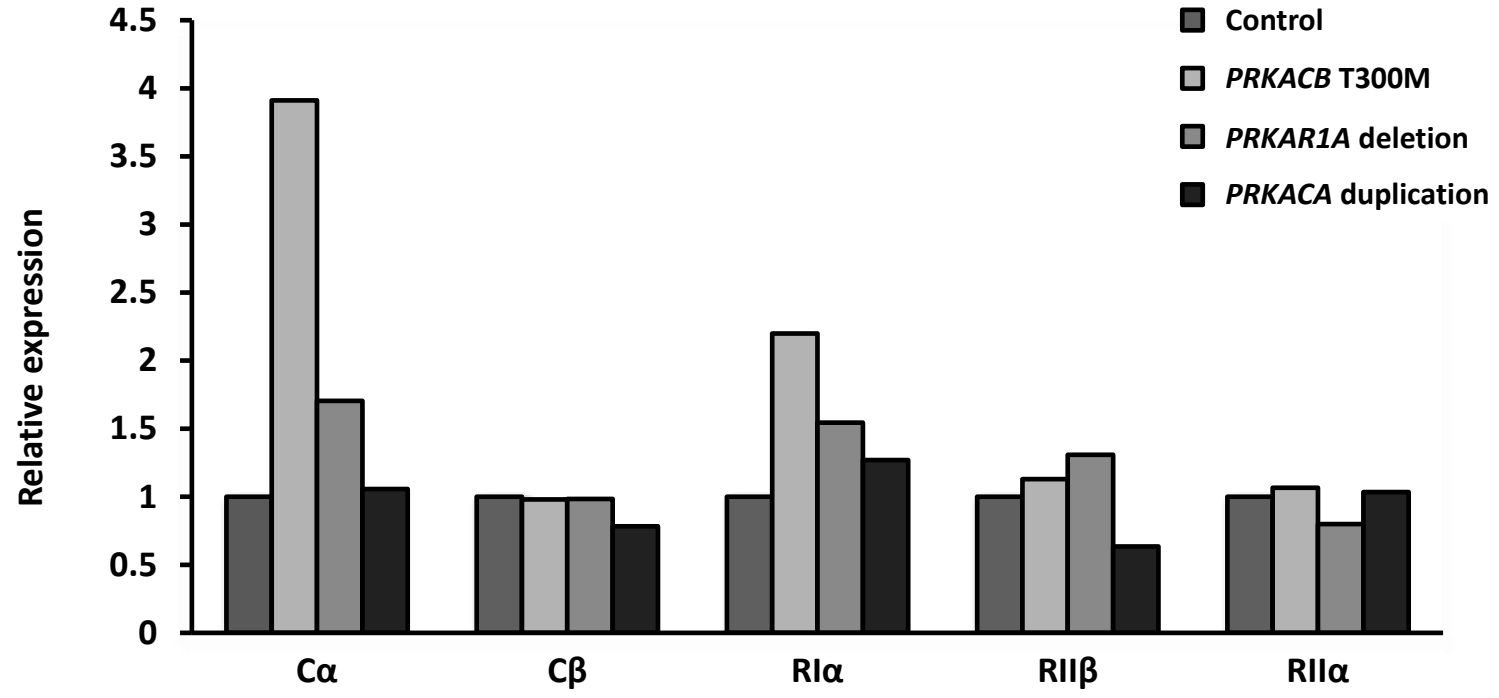

Supplement: NIHMS1640981-supplement-05.pdf [file NIHMS1640981-supplement-05.pdf]
